# Supplementary material for: The Effect of pH on the Structure and Lateral Organization of Cardiolipin in Langmuir Monolayers
Source: PubMed Central journal article supplement (PMC9804817; doi:10.1002/cphc.202200218), 2022-08-03
Supplement: CPHC-23-0-s001.pdf [file CPHC-23-0-s001.pdf]

# ChemPhysChem

Supporting Information

## **The Effect of pH on the Structure and Lateral Organization of Cardiolipin in Langmuir Monolayers**

Marina Sturm,\* Olof Gutowski, and Gerald Brezesinski

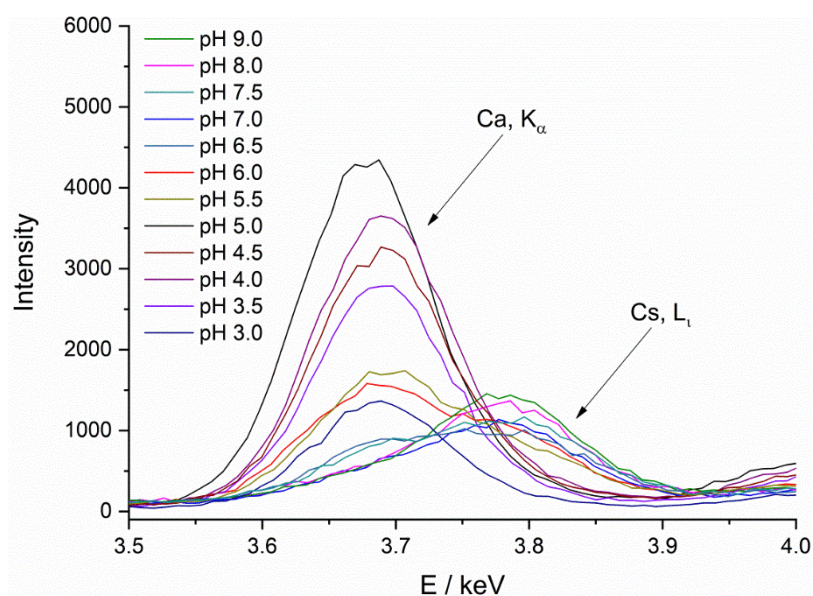

**Figure S1.** The chart illustrates the ability of EDTA to bind calcium at pH values higher than 5. Below pH 5, the cesium  $L_I$  line is completely covered by the calcium  $K_\alpha$  line. With the binding of calcium by EDTA, the line intensity of calcium becomes weaker (pH 5.5 to pH 6) and the cesium line becomes visible. From pH 6.5 to pH 9, the cesium line is fully visible.

**Table S1.** GIXD data and structural parameters of TMCL on a subphase containing 1 mM Cs and 0.1 mM EDTA at 20 °C and pH 6. The peak positions ( $Q_{xy}$  and  $Q_z$ ), lattice parameters of the unit cell ( $a$ ,  $b$ ,  $c$ ), distortion ( $d$ ), tilt angle ( $t$ ), in-plane area of one chain ( $A_{xy}$ ), cross-sectional chain area ( $A_0$ ), and correlation lengths ( $L_{xy}^1$ ,  $L_{xy}^2$ ,  $L_{xy}^3$ ) are presented.

| $\pi$ ,<br>$mNm^{-1}$ | $Q_{xy}^1$ ,<br>$\text{\AA}^{-1}$ | $Q_z^1$ ,<br>$\text{\AA}^{-1}$ | $Q_{xy}^2$ ,<br>$\text{\AA}^{-1}$ | $Q_z^2$ ,<br>$\text{\AA}^{-1}$ | $Q_{xy}^3$ ,<br>$\text{\AA}^{-1}$ | $Q_z^3$ ,<br>$\text{\AA}^{-1}$ | $a/b/c$ ,<br>$\text{\AA}$ | $d$    | $t$<br>$^\circ$ | $A_{xy}$ ,<br>$\text{\AA}^2$ | $A_0$ ,<br>$\text{\AA}^2$ | $L_{xy}^1$ ,<br>$\text{\AA}$ | $L_{xy}^2$ ,<br>$\text{\AA}$ | $L_{xy}^3$ ,<br>$\text{\AA}$ |
|-----------------------|-----------------------------------|--------------------------------|-----------------------------------|--------------------------------|-----------------------------------|--------------------------------|---------------------------|--------|-----------------|------------------------------|---------------------------|------------------------------|------------------------------|------------------------------|
| 14                    | 1.479                             | 0.145                          | 1.458                             | 0.438                          | 1.427                             | 0.583                          | 4.896<br>5.002<br>5.074   | 0.0415 | 23.1            | 21.6                         | 19.8                      | 350                          | 164                          | 138                          |
| 15                    | 1.483                             | 0.160                          | 1.463                             | 0.422                          | 1.434                             | 0.582                          | 4.884<br>4.982<br>5.050   | 0.0389 | 22.8            | 21.4                         | 19.8                      | 306                          | 118                          | 118                          |
| 22                    | 1.486                             | 0.136                          | 1.469                             | 0.391                          | 1.456                             | 0.527                          | 4.887<br>4.931<br>4.988   | 0.0236 | 20.6            | 21.1                         | 19.7                      | 350                          | 126                          | 186                          |
| 26                    | 1.491                             | 0                              | 1.482                             | 0.281                          | -                                 | -                              | 4.906<br>4.876            | 0.0081 | 12.4            | 20.7                         | 20.2                      | 588                          | 208                          | --                           |
| 30                    | 1.495                             | 0                              | 1.493                             | 0.195                          | -                                 | -                              | 4.862<br>4.856            | 0.0018 | 8.6             | 20.4                         | 20.2                      | 681                          | 225                          | --                           |
| 35                    | 1.500                             | 0                              | -                                 | -                              | -                                 | -                              | 4.837                     | 0      | 0               | -                            | 20.3                      | 506                          | -                            | -                            |

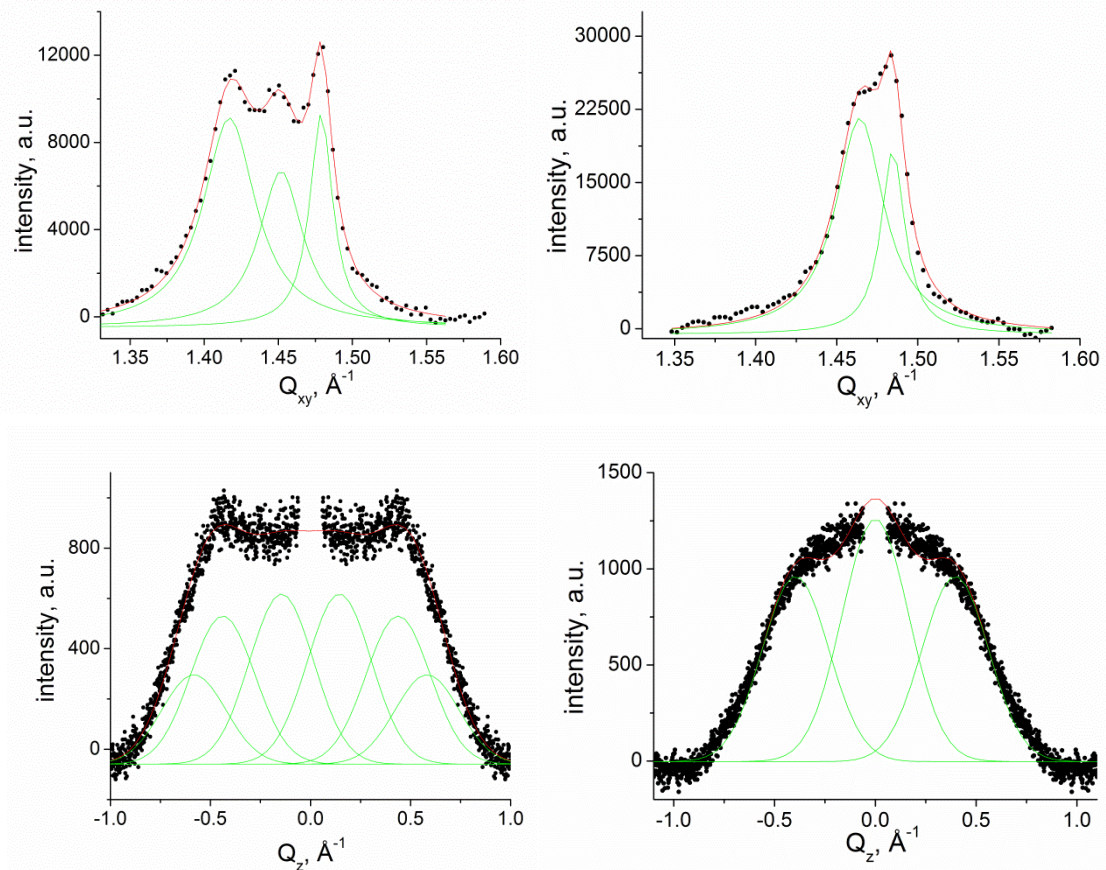

**Figure S2.** Bragg peaks (top) and Bragg rods (bottom) of TMCL on subphases at pH 6. Left: subphase containing 1 mM  $\text{Cs}^+$  and 0.1 mM EDTA,  $\pi = 14 \text{ mN m}^{-1}$ , oblique phase. Right: subphase containing 1 mM  $\text{Cs}^+$  and 0.1 mM EDTA,  $\pi = 15 \text{ mN m}^{-1}$ , orthorhombic phase  $L_2$ .

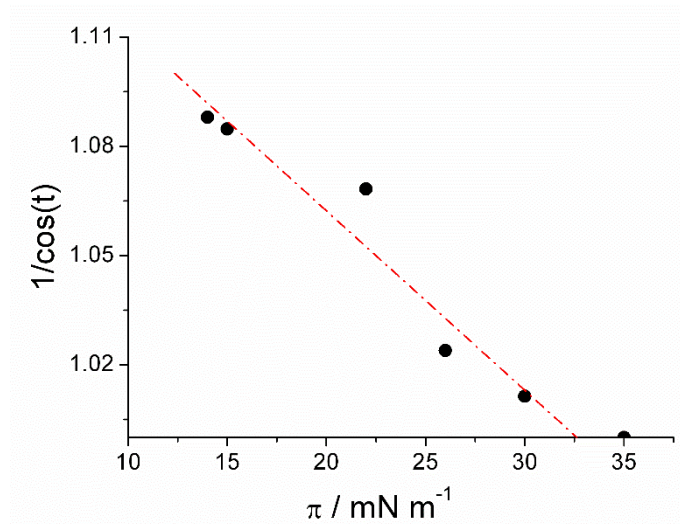

**Figure S3.**  $1/(\cos \cdot t)$  versus the lateral pressure of TMCL monolayers on a subphase containing 1 mM Cs and 0.1 mM EDTA at 20 °C and pH 6. The linear extrapolation toward zero tilt angle ( $1/(\cos \cdot t) = 1$ ) yields the pressure  $\pi_{t_2}$  of the tilting transition (see table S2).

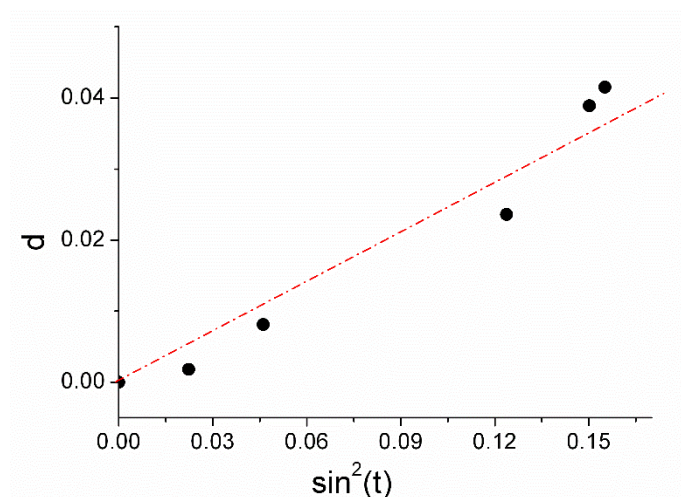

**Figure S4.** Lattice distortion  $d$  versus  $\sin^2(t)$  of TMCL monolayers on a subphase containing 1 mM Cs and 0.1 mM EDTA at 20 °C and pH 6.

**Table S2.** Phase transition pressures ( $\pi_{t1}$ : oblique to orthorhombic ( $L_2$ ) and  $\pi_{t2}$ :  $L_2$  - LC) obtained by GIXD measurements.

| pH  | $\pi_{t1}$<br>mN m <sup>-1</sup> | $\pi_{t2}$<br>mN m <sup>-1</sup> |
|-----|----------------------------------|----------------------------------|
| 3.0 | 5.0                              | 12.5                             |
| 3.5 | 9.0                              | 16.6                             |
| 4.0 | 12.0                             | 20.4                             |
| 4.5 | 14.5                             | 23.6                             |
| 5.0 | 15.5                             | 27.8                             |
| 5.5 | 21.0                             | 32.2                             |
| 6.0 | 24.0                             | 32.6                             |
| 6.5 | 31.0                             | 41.2                             |
| 7.0 | 32.0                             | 39.5                             |
| 7.5 | 33.0                             | 44.5                             |
| 8.0 | 34.0                             | 43.1                             |
| 9.0 | 37.5                             | 45.7                             |
